# Supplementary material
Source: PubMed Central journal article supplement (PMC3774606)
Supplement: NIHMS459770-supplement-1.pdf [file NIHMS459770-supplement-1.pdf]

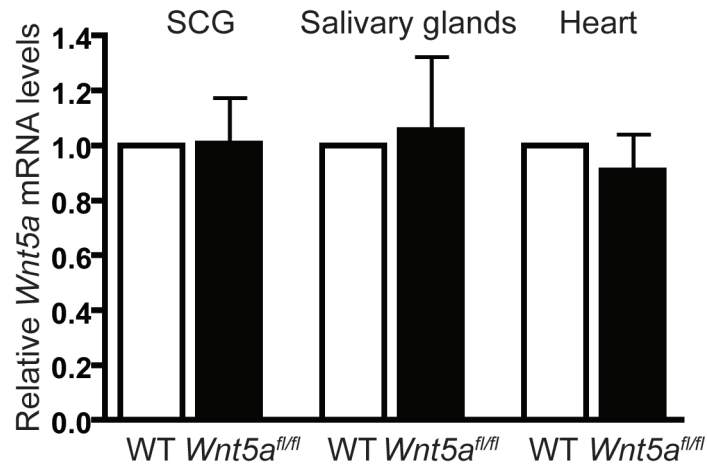

**Supplementary Fig 1.** Normal *Wnt5a* expression in floxed (*Wnt5a<sup>fl/fl</sup>*) mice. Quantitative real-time PCR analyses show that *Wnt5a* transcript levels in the superior cervical ganglia (SCG), salivary glands and hearts from *Wnt5a<sup>fl/fl</sup>* mice are not significantly different compared to wild-type mice (C57BL/6) at P0.5. SCGs and salivary glands were harvested from n=6 wild-type and *Wnt5a<sup>fl/fl</sup>* mice. Hearts were dissected from n=4 wild-type and n=8 *Wnt5a<sup>fl/fl</sup>* mice. Values are the mean ± s.e.m.

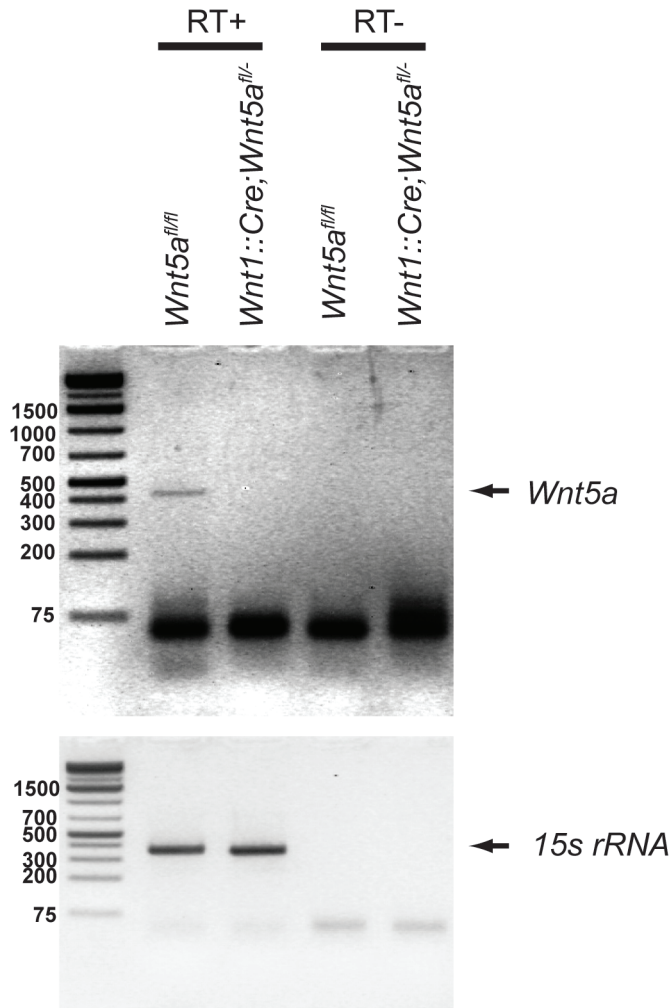

**Supplementary Fig 2.** RT-PCR analysis of *Wnt5a* mRNA in *Wnt1::Cre;Wnt5a<sup>fl/-</sup>* and *Wnt5a<sup>fl/fl</sup>* sympathetic ganglia. *Wnt5a* mRNA was detected using primers that target 5'untranslated region to exon 3 of the *Wnt5a* gene, generating a product of 423bp (*Wnt5a*-F: 5'-AAGGCTTAACCCCGACGCTTC-3' and *Wnt5a*-R: 5'-ATCTCCGATGCCGGAAGTGGT-3'). 15S rRNA sequence was used as a control (15S rRNA-F: 5'-TTCCGCAAGTTCACCTACC-3' and 15S rRNA-R: 5'-CGGGCCGGCCATGCTTTACG-3'). The absence of a PCR product in *Wnt1::Cre;Wnt5a<sup>fl/-</sup>* sympathetic ganglia suggests that the *Wnt5a* transcript missing exon 2, likely, undergoes nonsense mediated decay.

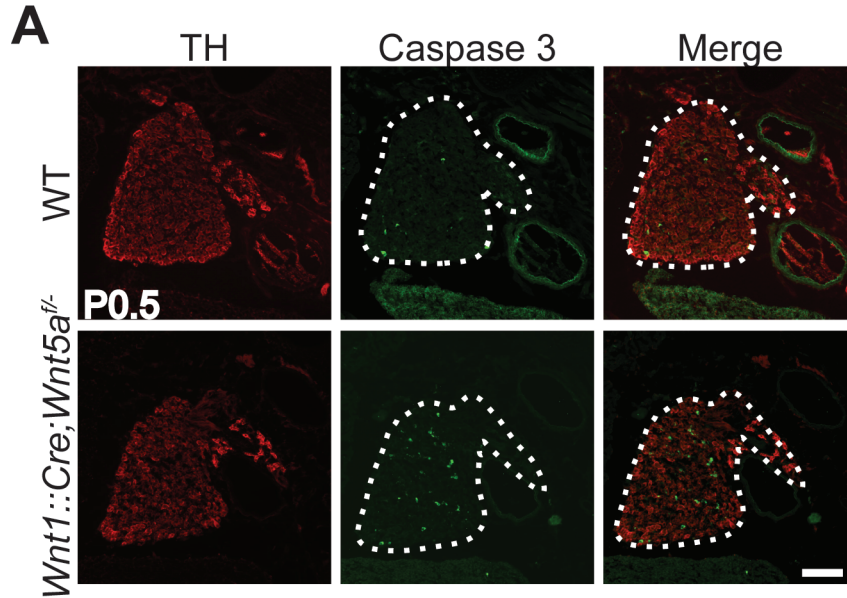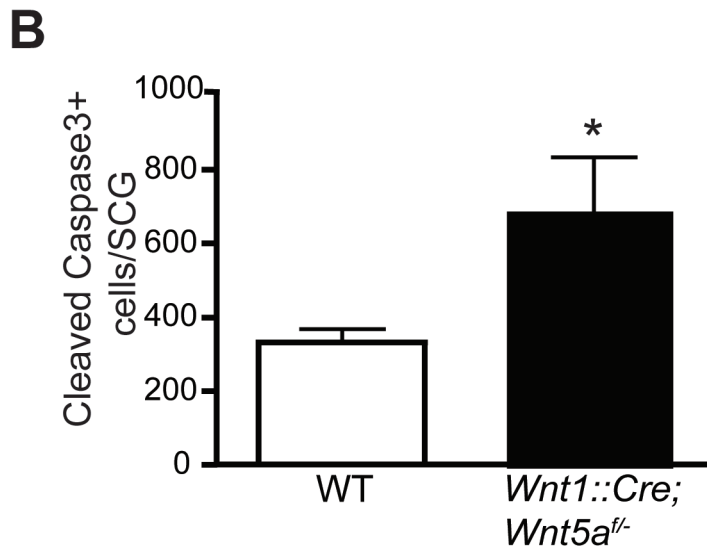

**Supplementary Fig 3.** Enhanced apoptosis in *Wnt1::Cre;Wnt5a<sup>f/-</sup>* sympathetic ganglia. Cleaved caspase-3 immunofluorescence shows increased apoptosis in P0.5 *Wnt1::Cre;Wnt5a<sup>f/-</sup>* SCGs as compared to wild-type ganglia. Dashed lines outline the superior cervical ganglia (SCG). Tissue sections have also been stained with TH to reveal the SCG. Scale bar, 100  $\mu$ m. Values are the mean  $\pm$  SEM; n=4 embryos for wild-type and n=3 for *Wnt1-Cre;Wnt5a<sup>f/-</sup>*, \*p<0.03.
